# Supplementary material for: Recombinant γY278H Fibrinogen Showed Normal Secretion from CHO Cells, but a Corresponding Heterozygous Patient Showed Hypofibrinogenemia
Source: Preprints.org preprint supplement (doi:10.20944/preprints202104.0347.v1), 2021-04-13
Supplement: Supplementary file 2 [file supplementary]

## Sheet: Sheet1
Supplement Table 1. Primers
mutant		primer
γL276P	sense	GCTGACAAGTACCGCCCAACATATGCCTACTTC
	antisense	GAAGTAGGCATATGTTGGGCGGTACTTGTCAGC
γT277R	sense	GTACCGCCTAAGATATGCCTACTTCGCTGGTG
	antisense	CACCAGCGAAGTAGGCATATCTTAGGCGGTAC
γT277P	sense	GACAAGTACCGCCTACCATATGCCTACTTCGC
	antisense	GCGAAGTAGGCATATGGTAGGCGGTACTTGTC
γY278H	sense	GTACCGCCTAACACATGCCTACTTCGCTGGTG
	antisense	CACCAGCGAAGTAGGCATGTGTTAGGCGGTAC
γA279D	sense	CCGCCTAACATATGACTACTTCGCTGGTGGG
	antisense	CCCACCAGCGAAGTAGTCATATGTTAGGCGG
γY280C	sense	CGCCTAACATATGCCTGCTTCGCTGGTGGGGATG
	antisense	CATCCCCACCAGCGAAGCAGGCATATGTTAGGCG
